# Supplementary material
Source: Springer Nature journal article supplement (https://www.springermedizin.de/resource/supplementary/12935_2013_595_MOESM1_ESM.pdf/9540748)

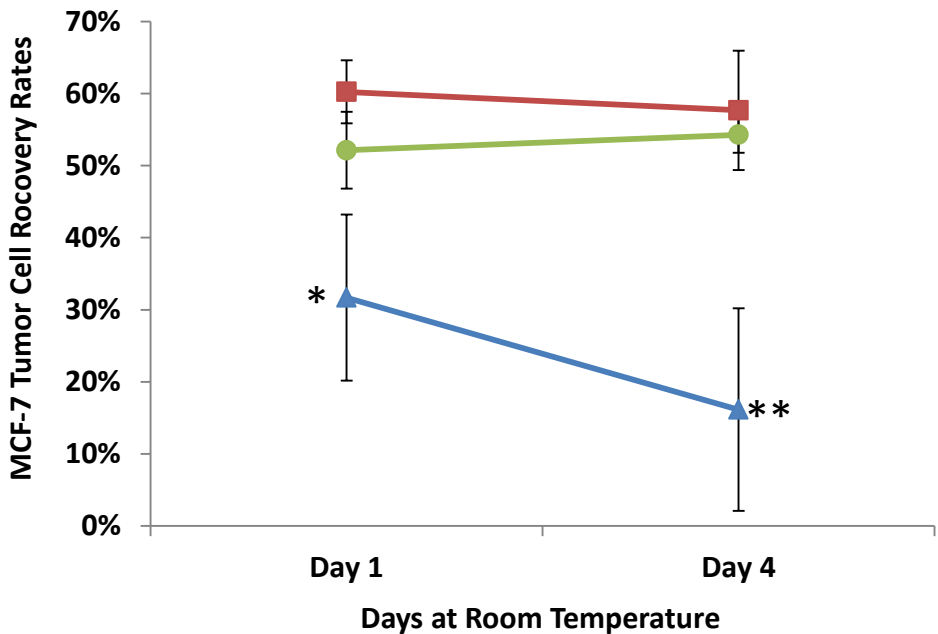

■ BCT      ● CellSave tube      ▲ K<sub>3</sub>EDTA tube

Supplement: MOESM1 [file 9540748]
